# Supplementary material for: ‘Lines in the sand’: an Australian qualitative study of patient group practices to promote independence from pharmaceutical industry funders
Source: HighWire-hosted journal article supplement (doi:10.1136/bmjopen-2020-045140), 2021-02-01
Supplement: bmjopen-2020-045140supp001_data_supplement.pdf [file bmjopen-2020-045140supp001_data_supplement.pdf]

**Supplementary File 1**Body systems

Respiratory

Neurological

Cardiovascular

Renal

Gastrointestinal

Sensorineural

Dermatological

Musculoskeletal

Women's health

Mental health

Haematological

Endocrine

Pathological processes

Immunological

Infection

Genetic

Cancer

Degenerative

Inflammatory

Endocrine

Vascular

Trauma

Toxic

Metabolic
