# Supplementary material for: ‘Lines in the sand’: an Australian qualitative study of patient group practices to promote independence from pharmaceutical industry funders
Source: HighWire-hosted journal article supplement (doi:10.1136/bmjopen-2020-045140), 2021-02-01
Supplement: bmjopen-2020-045140supp002_data_supplement.pdf [file bmjopen-2020-045140supp002_data_supplement.pdf]

## General topics for semi-structured interviews

1. **Contextual information about the group** – eg main focus, aims and scope, main activities, size
2. **Interviewee's role within the group** – eg staff or volunteer, length of time associated with the group, experience within the group, role and activities
3. **Funding of the group** – eg regular funders, funding activities, previous funding patterns, challenges associated with obtaining funding
4. **Pharmaceutical funding, what happens & how it happens**
  - current and previous pharmaceutical funders
  - mechanics of funding eg how did it start, personnel involved, how is the amount determined
  - type of funding eg donation, payment for advertising
  - other types of pharmaceutical support – eg pharmaceutical personnel on group executive, provision of conference venue, delivery of educational material
5. **Group activities related to pharmaceuticals** eg advertising, distributing information, public advocacy
6. **Pharmaceutical funding, group experiences and policies**
  - eg is there a policy about pharmaceutical funding
  - is there any discussion within the group about pharmaceutical funding
  - any differences of opinion?
  - is there any (real or perceived) pressure to conform to the interests of industry?
  - is there any pestering by industry reps or others about funding or contributing to the group in others ways?
