# Supplementary material for: ‘Lines in the sand’: an Australian qualitative study of patient group practices to promote independence from pharmaceutical industry funders
Source: HighWire-hosted journal article supplement (doi:10.1136/bmjopen-2020-045140), 2021-02-01
Supplement: bmjopen-2020-045140supp003_data_supplement.pdf [file bmjopen-2020-045140supp003_data_supplement.pdf]

## Coding tree

*Participant details* - previous occupation/experience; role (CEO/director, other staff, Board)

*Group details* - location (local, national); focus (disease specific, health services); funding sources; involvement of pharma in group's foundation

*Interactions with pharmaceutical industry* – how many companies; who initiates; relationships and who has power; what events are funded (what kinds, frequency); what other benefits or resources are provided by industry; what group gives to industry; companies overstepping the mark

*What companies wants* – views on why pharma is sponsoring you

*Rules* – personal or group rules on what you would / would not accept pharma funding for; Medicines Australia code of conduct

*Reasons* – why your group accepts pharma sponsorship; why your group doesn't accept pharma sponsorship; why it might be different for other groups; responding to critics; in an ideal world would you accept pharma funding? (why/why not)

*Independence* – trust; perceived independence / brand; transparency
